# Supplementary material for: Effectiveness of the BNT162b2 mRNA COVID-19 Vaccine in Pregnancy
Source: Research Square preprint supplement (doi:10.21203/rs.3.rs-665725/v1), 2021-07-12

**Supplementary Material**

**Effectiveness of the** **BNT162b2 mRNA COVID-19 Vaccine in Pregnancy**

Noa Dagan, MD*1,2,3,4; Noam Barda, MD*1,2,3,4; Tal Biron-Shental5,6; Maya Makov-Assif1, Calanit Key RN7; Isaac S. Kohane MD3,4; Miguel A. Hernán, MD8,9; Marc Lipsitch, DPhil10; Sonia Hernandez-Diaz, MD**8; Ben Y. Reis, PhD**4,11,12; Ran D. Balicer, MD**1,13

1 Clalit Research Institute, Innovation Division, Clalit Health Services, Tel Aviv, Israel

2 Software and Information Systems Engineering, Ben Gurion University, Be'er Sheva, Israel

3 Department of Biomedical Informatics, Harvard Medical School, Boston, MA, USA

4 Ivan and Francesca Berkowitz Family Living Laboratory at Harvard Medical School, Boston, MA

5 Department of Obstetrics and Gynecology, Meir Medical Center, Kfar Saba, Israel

6 Sackler School of Medicine, Tel-Aviv University, Tel-Aviv, Israel

7 Clalit Community Division, Clalit Health Services, Tel-Aviv, Israel

8 Departments of Epidemiology and Biostatistics, Harvard T.H. Chan School of Public Health, Boston, MA, USA

9 Harvard-MIT Division of Health Sciences and Technology, Boston, MA, USA

10 Center for Communicable Disease Dynamics, Department of Epidemiology and Department of Immunology and Infectious Diseases, Harvard T.H. Chan School of Public Health, Boston, MA, USA

11 Predictive Medicine Group, Computational Health Informatics Program, Boston Children’s Hospital, Boston, MA, USA

12 Harvard Medical School, Boston, MA, USA

13 School of Public Health, Faculty of Health Sciences, Ben Gurion University of the Negev, Be'er Sheva, Israel

* These authors contributed equally.

** These authors contributed equally.

Contents

[Table S1 – Variable Definitions. 3](#_Toc75340041)

[Table S2 - Baseline characteristics of the full, eligible and matched study vaccinated populations. 11](#_Toc75340042)

[Table S3 - Baseline characteristics of vaccinated individuals and unvaccinated controls. 13](#_Toc75340043)

[Table S4 - Event counts for each outcome at each analysis period 15](#_Toc75340044)

[Figure S1 – Population Flow Chart. 16](#_Toc75340045)

# Table S1 – Variable Definitions.

Names, possible values, definitions and time periods for all variables used in the study. Variables were defined using internal CHS registries, ICD9 codes and ATC codes. MOH: Ministry of Heath; CHS: Clalit Health Services; ICD: International Classification of Disease; ATC: Anatomic therapeutic chemical; NDC: National drug code.

| **Variable** | **Values** | **Definitions1** | **Timing2** |
| --- | --- | --- | --- |
| **Population Definition** | | | |
| Pregnancy | 0/1 | An “active” pregnancy recorded in the dedicated organizational information systems, with the most recent documentation less than two months ago. | Current |
| **Outcomes** | | | |
| Documented SARS-CoV-2 Infection | 0/1 | A PCR-confirmed infection. | The date of specimen collection that resulted in a positive PCR test for SARS-CoV-2.  If the PCR test was performed after the beginning of a hospitalization flagged as a COVID-19 hospitalization, the infection date was set to the beginning of the hospitalization. |
| COVID-19 (symptomatic SARS-CoV-2 Infection) | 0/1 | A PCR-confirmed infection with report of symptoms during the PCR referral / during the follow-up in the community setting / COVID-19 related hospitalization / COVID-19 related death.  Existing symptoms were considered when the physician or nurse checked the "symptomatic" option in the EMR, or when the following specific symptoms were recorded: fever or chills, cough, shortness of breath or difficulty breathing, sore throat, headache, weakness, congestion or runny nose, myalgia, nausea or vomiting, diarrhea, abdominal pain, loss of taste or smell, inability to eat or drink. | The date set for the SARS-CoV-2 infection outcome. |
| COVID-19 related hospitalization | 0/1 | A hospitalization that was reported to the Israeli MOH as a hospitalization of a SARS-CoV-2 infected individual. | The start date of the hospitalization |
| COVID-19 related severe state | 0/1 | As defined by the hospitalizing institution per the Israeli MOH guidelines, consistent with the NIH criteria for severe illness or critical illness(1):  Individuals who have SpO2 <94% on room air at sea level, a ratio of arterial partial pressure of oxygen to fraction of inspired oxygen (PaO2/FiO2) <300 mm Hg, respiratory frequency >30 breaths/min, or lung infiltrates >50%.  Critical Illness: Individuals who have respiratory failure, septic shock, and/or multiple organ dysfunction. | The first date during the hospitalization in which the individual was flagged as being in a severe or critical state. |
| COVID-19 related death | 0/1 | Death of a SARS-CoV-2-infected individual reported to the Israeli MOH | The reported date of death |
| **Vaccination Period** | | | |
| Days 14-20 after the 1st dose | 0/1 | From 14 days and until 20 days after the first dose | After the index date |
| Days 21-27 after the 1st dose | 0/1 | From 21 days and until 27 days after the first dose | After the index date |
| Days 7-56 after the 2nd dose | 0/1 | From day 7 and until day 56 after the second dose | After the index date |
| **Covariates** | | | |
| Age | Integer | Age in complete years | Current |
| Sex | Male/Female | As defined in CHS’ files | Current |
| Pregnancy Trimester | 1/2/3 | Number of complete weeks from the documented last menstrual period (first trimester = under 12 weeks, second trimester = 13-26 weeks, third trimester, 27 weeks or more) | Current |
| Place of Residence | List of places | Geo-statistical area in which the patient resides per CHS’ files. If information on geo-statistical area is not available, the city/town of residence is used instead | Current |
| Health-care worker | 0/1 | Is patient a health-care worker per CHS’ files | Current |
| Long-term care facility resident | 0/1 | Is patient a long-term care facility resident per CHS’ files | Current |
| Confined to Home | 0/1 | Is patient confined to his home per CHS’ files | Current |
| Influenza vaccinations | 0/1 | Did patient receive an influenza vaccine in the last 5 years | Last 5 Years |
| Cancer | 0/1 | ICD9 Code 174*  ICD9 Code 175*  ICD9 Code 233.0  ICD9 Code V10.3  ICD9 Proc Code 85.4*  ICD9 Code 153*  ICD9 Code 154*  ICD9 Code V10.5*  ICD9 Code V10.6*  ICD9 Code 185  ICD9 Code V10.46  ICD9 Code 162*  ICD9 Code V10.1*  ICD9 Code 188*  ICD9 Code V10.51  ICD9 Code 183*  ICD9 Code V10.43  ICD9 Code 179  ICD9 Code 182*  ICD9 Code V10.42  ICD9 Code 157*  ICD9 Code 191*  ICD9 Code 192*  ICD9 Code V10.85  ICD9 Code 151*  ICD9 Code V10.04  ICD9 Code 172*  ICD9 Code V10.82  ICD9 Code 201*  ICD9 Code 200*  ICD9 Code 202.4*  ICD9 Code 204*  ICD9 Code 205*  ICD9 Code 206*  ICD9 Code 207.1*  ICD9 Code 208.1*  ICD9 Code 189*  ICD9 Code V10.52  ICD9 Code 160*  ICD9 Code 161*  ICD9 Code 164.0  ICD9 Code 195.0  ICD9 Code V10.21  ICD9 Code V10.22  ICD9 Code 180*  ICD9 Code V10.41  ICD9 Code 140*  ICD9 Code 141*  ICD9 Code 142*  ICD9 Code 143*  ICD9 Code 144*  ICD9 Code 145*  ICD9 Code 150*  ICD9 Code V10.03  ICD9 Code 155*  ICD9 Code 156*  ICD9 Code V10.07  ICD9 Code 170*  ICD9 Code V10.81  ICD9 Code 193  ICD9 Code V10.87  ICD9 Code 171*  ICD9 Code 176*  ICD9 Code 184*  ICD9 Code 186*  ICD9 Code 187*  ICD9 Code V10.4*  ICD9 Code 203*  ICD9 Code 273.3  ICD9 Code 152*  ICD9 Code 158*  ICD9 Code 159*  ICD9 Code 163*  ICD9 Code 164*  ICD9 Code 165*  ICD9 Code 181  ICD9 Code 190*  ICD9 Code 192.8  ICD9 Code 196*  ICD9 Code 197*  ICD9 Code 198*  ICD9 Code 199* | Last 5 years |
| Chronic Kidney Disease | 0/1 | ICD Proc Code 39.95  ICD Proc Code 54.98  ICD9 Code 996.81  ICD9 Code V42.0  ICD Proc Code 55.6*  ICD9 Code 403._1  ICD9 Code 404._2  ICD9 Code 404._3  ICD9 Code 585*  ICD9 Code 586  ICD9 Code 250.4*  ICD9 Code 274.1*  ICD9 Code 440.1  ICD9 Code 581*  ICD9 Code 582*  ICD9 Code 583*  ICD9 Code 587  ICD9 Code 588*  ICD9 Code 589* | Ever |
| Chronic Obstructive Pulmonary Disease | 0/1 | ICD9 Code 491*  ICD9 Code 492*  ICD9 Code 496 | Ever |
| Heart Conditions | 0/1 | ICD9 Code 410*  ICD9 Code 411*  ICD9 Code 412  ICD9 Code 413*  ICD9 Code 414*  ICD9 Code 429.2, 429.7*  ICD9 Code V45.81, V45.82  ICD9 Proc Code 36.0*  ICD9 Proc Code 36.1*  ICD9 Code 428*  ICD9 Code 398.91  ICD9 Code 402._1  ICD9 Code 404._1, ICD9 Code 404._3  ICD9 Code 416.9  ICD9 Code 514  ICD9 Code 425*  ICD9 Code 416* | Ever |
| Solid Organ Transplant Recipient | 0/1 | ICD9 Code 996.81  ICD9 Code V42.0  ICD Proc Code 55.6*  ICD9 Code V42.7  ICD Proc Code 50.5*  ICD9 Code V42.1  ICD9 Code V43.2  ICD Proc Code 37.5  ICD9 Code V42.83  ICD Proc Code 52.8*  ICD9 Code V42.6  ICD Proc Code 33.5*  ICD Proc Code 33.6 | Ever |
| Obesity | 0/1 | Body Mass Index (BMI) 30-40 | Latest measurement in last 5 years not taken during pregnancy |
| Severe Obesity | 0/1 | Body Mass Index (BMI) 40+ | Latest measurement in last 5 years not taken during pregnancy |
| Pregnancy | 0/1 | Internal Clalit Registry | Current |
| Sickle Cell Disease | 0/1 | ICD9 Code 282.6* | Ever |
| Smoking | 0/1 | Internal Clalit Registry | Last recorded value |
| Type 2 Diabetes Mellitus | 0/1 | HbA1C > 6.5  ATC Codes A10[A,B]  ICD9 Code 250*  ICD9 Code 357.2  ICD9 Code 362.0*  **And not:**  ICD9 Code 250._1, 250._3 | For diagnosis codes, Ever  For drugs, 4 or more dispensed in last 12 months |
| Asthma | 0/1 | ICD9 Code 493* | Ever |
| Cerebrovascular Disease | 0/1 | ICD9 Code 362.34  ICD9 Code 430  ICD9 Code 431  ICD9 Code 432*  ICD9 Code 433*  ICD9 Code 434*  ICD9 Code 435*  ICD9 Code 436*  ICD9 Code 438* | Ever |
| Other Respiratory Disease | 0/1 | ICD9 Code 277.0*  ICD9 Code 494*  ICD9 Code 515 | Ever |
| Hypertension | 0/1 | ICD9 Code 401*  ICD9 Code 402*  ICD9 Code 403*  ICD9 Code 404*  ICD9 Code 405* | Ever |
| Immunocompromised State | 0/1 | **Any of:**  ICD9 Code 042*  ICD9 Code 043*  ICD9 Code 044*  ICD9 Code 795.71  ICD9 Code V08  ICD9 Code V42.8*  ICD9 Proc Code 41.0*  **Or at least 2 of:**  ATC4 Code H02AB  ATC4 Code H02BX  ATC4 Code M01BA  **Or at least 2 of:**  ATC2 Code L04 | For diagnosis codes, Ever  For drugs, 4 or more dispensed in last 12 months |
| Neurologic Conditions | 0/1 | ICD9 Code 290.*  ICD9 Code 294*  ICD9 Code 310.1  ICD9 Code 331*  ATC Codes N06DA02, N06DA03  ICD9 Code 358*  ICD9 Code 332.[0,1]  ICD9 Code 345*  ICD9 Code 340  ATC Codes L03AB07, L03AB08, L04AA07  ICD9 Code 343*  ICD9 Code 333.4  ICD9 Code 334*  ICD9 Code 356*  ICD9 Code 138  ICD9 Code 335*  ICD9 Code 730.7*  ICD9 V12.02  ICD9 Code 228.02  ICD9 Code 307.23  ICD9 Code 330.9  ICD9 Code 331.3*  ICD9 Code 331.4  ICD9 Code 333*  ICD9 Code 334*  ICD9 Code 336*  ICD9 Code 337  ICD9 Code 335.1*  ICD9 Code 359.0  ICD9 Code 359.21  ICD9 Code 357.0  ICD9 Code 237.7*  ICD9 Code 742.8[1,2] | For diagnosis codes, Ever  For drugs, 4 or more dispensed in last 12 months |
| Liver Disease | 0/1 | ICD9 Code 070.22  ICD9 Code 070.23  ICD9 Code 070.32  ICD9 Code 070.33  ICD9 Code 070.44  ICD9 Code 070.54  ICD9 Code V02.61  ICD9 Code V02.62  ICD9 Code 571*  ICD9 Code 275.1  ICD9 Code 277.4  ICD9 Code 452  ICD9 Code 453.0  ICD9 Code 571.8  ICD9 Code 571.9  ICD9 Code 572* | Ever |
| Overweight | 0/1 | Body Mass Index (BMI) 25-30 | Latest measurement in last 5 years not taken during pregnancy |
| Thalassemia | 0/1 | ICD9 Code 282.4* | Ever |
| Type 1 Diabetes Mellitus | 0/1 | ICD9 Code 250._1, 250._3 | Ever |
| CDC Risk Factor Count | Integer | Summation of 1 point for each of the following:   - Cancer - CKD - Heart Disease - Sickle Cell Disease - Asthma - Cerebrovascular Disease - Hypertension - Neurological Disease - Liver Disease - Thalassemia - COPD or other respiratory disease - Type 1 or 2 Diabetes Mellitus - Solid organ transplant recipient or immunodeficiency - Obesity or severe obesity | Based on the variables above |

1Additional confirmation of the diagnostic codes was done by checking the matching of the free text within the diagnosis description field.

2Covariates were extracted at the beginning of the calendar month in which the index date occurred.

# **Table S2 - Baseline characteristics of the full, eligible and matched study vaccinated populations.**

Comparison of the full vaccinated population of pregnant women in CHS, the eligible vaccinated population, and the matched study population. (CDC: Centers for disease control and prevention; BMI: Body mass index.)

| Variable | Full, N = 40,207 | Eligible, N = 28,227 | Matched, N = 10,861 |
| --- | --- | --- | --- |
| Age | 31 (27, 35) | 31 (27, 35) | 30 (26, 33) |
| Pregnancy Trimester |  |  |  |
| 1 | 8,682 (22%) | 6,392 (23%) | 2,814 (26%) |
| 2 | 20,468 (51%) | 14,238 (50%) | 5,242 (48%) |
| 3 | 11,057 (28%) | 7,597 (27%) | 2,805 (26%) |
| Population Sector |  |  |  |
| General Jewish | 28,300 (71%) | 19,989 (71%) | 5,663 (52%) |
| Arab | 8,150 (20%) | 5,983 (21%) | 4,464 (41%) |
| Ultra-Orthodox Jewish | 3,489 (8.7%) | 2,248 (8.0%) | 734 (6.8%) |
| Missing | 268 | 7 | 0 |
| CDC Risk Factor Count |  |  |  |
| 0 | 29,665 (74%) | 20,783 (74%) | 8,900 (82%) |
| 1+ | 10,542 (26%) | 7,444 (26%) | 1,961 (18%) |
| Flu Vaccinations in the Last 5 Years |  |  |  |
| 0-1 | 30,741 (76%) | 21,852 (77%) | 9,786 (90%) |
| 2+ | 9,466 (24%) | 6,375 (23%) | 1,075 (9.9%) |
| CDC “Certain” Risk Criteria |  |  |  |
| Cancer | 339 (0.8%) | 236 (0.8%) | 53 (0.5%) |
| Chronic Kidney Disease | 1,087 (2.7%) | 780 (2.8%) | 185 (1.7%) |
| Chronic Obstructive Pulmonary Disease | 39 (<0.1%) | 29 (0.1%) | 4 (<0.1%) |
| Heart Disease | 52 (0.1%) | 42 (0.1%) | 6 (<0.1%) |
| Solid Organ Transplant | 10 (<0.1%) | 4 (<0.1%) | 0 (0%) |
| Obesity (BMI 30-40) | 5,055 (13%) | 3,624 (13%) | 1,048 (9.6%) |
| Severe Obesity (BMI 40+) | 440 (1.1%) | 308 (1.1%) | 100 (0.9%) |
| Sickle Cell Disease | 12 (<0.1%) | 9 (<0.1%) | 5 (<0.1%) |
| Smoking | 2,856 (7.1%) | 2,142 (7.6%) | 643 (5.9%) |
| Type 2 Diabetes Mellitus | 329 (0.8%) | 233 (0.8%) | 52 (0.5%) |
| CDC “Possible” Risk Criteria |  |  |  |
| Asthma | 2,539 (6.3%) | 1,789 (6.3%) | 372 (3.4%) |
| Cerebrovascular Disease | 96 (0.2%) | 62 (0.2%) | 5 (<0.1%) |
| Other Respiratory Disease | 32 (<0.1%) | 24 (<0.1%) | 7 (<0.1%) |
| Hypertension | 292 (0.7%) | 189 (0.7%) | 40 (0.4%) |
| Immunosuppression | 670 (1.7%) | 417 (1.5%) | 108 (1.0%) |
| Neurological Disease | 780 (1.9%) | 538 (1.9%) | 116 (1.1%) |
| Liver Disease | 275 (0.7%) | 174 (0.6%) | 55 (0.5%) |
| Overweight (BMI 25-30) | 9,535 (24%) | 6,915 (24%) | 2,760 (25%) |
| Thalassemia | 428 (1.1%) | 303 (1.1%) | 117 (1.1%) |
| Type 1 Diabetes Mellitus | 137 (0.3%) | 85 (0.3%) | 19 (0.2%) |

# **Table S3 - Baseline characteristics of vaccinated individuals and unvaccinated controls.**

Comparison of the vaccinated and unvaccinated groups, following the matching process. (CDC: Centers for disease control and prevention; BMI: Body mass index.)

| Variable | Vaccinated  N = 10,861 | Unvaccinated  N = 10,861 |
| --- | --- | --- |
| Age | 30 (26, 33) | 30 (26, 33) |
| Pregnancy Trimester |  |  |
| 1 | 2,814 (26%) | 2,814 (26%) |
| 2 | 5,242 (48%) | 5,242 (48%) |
| 3 | 2,805 (26%) | 2,805 (26%) |
| Population Sector |  |  |
| General Jewish | 5,663 (52%) | 5,663 (52%) |
| Arab | 4,464 (41%) | 4,464 (41%) |
| Ultra-Orthodox Jewish | 734 (6.8%) | 734 (6.8%) |
| CDC Risk Factor Count |  |  |
| 0 | 8,900 (82%) | 8,900 (82%) |
| 1+ | 1,961 (18%) | 1,961 (18%) |
| Flu Vaccinations in the Last 5 Years |  |  |
| 0-1 | 9,786 (90%) | 9,786 (90%) |
| 2+ | 1,075 (9.9%) | 1,075 (9.9%) |
| CDC “Certain” Risk Criteria |  |  |
| Cancer | 53 (0.5%) | 41 (0.4%) |
| Chronic Kidney Disease | 185 (1.7%) | 215 (2.0%) |
| Chronic Obstructive Pulmonary Disease | 4 (<0.1%) | 7 (<0.1%) |
| Heart Disease | 6 (<0.1%) | 13 (0.1%) |
| Solid Organ Transplant | 0 (0%) | 1 (<0.1%) |
| Obesity (BMI 30-40) | 1,048 (9.6%) | 1,019 (9.4%) |
| Severe Obesity (BMI 40+) | 100 (0.9%) | 96 (0.9%) |
| Sickle Cell Disease | 5 (<0.1%) | 6 (<0.1%) |
| Smoking | 643 (5.9%) | 701 (6.5%) |
| Type 2 Diabetes Mellitus | 52 (0.5%) | 57 (0.5%) |
| CDC “Possible” Risk Criteria |  |  |
| Asthma | 372 (3.4%) | 388 (3.6%) |
| Cerebrovascular Disease | 5 (<0.1%) | 12 (0.1%) |
| Other Respiratory Disease | 7 (<0.1%) | 7 (<0.1%) |
| Hypertension | 40 (0.4%) | 34 (0.3%) |
| Immunosuppression | 108 (1.0%) | 101 (0.9%) |
| Neurological Disease | 116 (1.1%) | 130 (1.2%) |
| Liver Disease | 55 (0.5%) | 42 (0.4%) |
| Overweight (BMI 25-30) | 2,760 (25%) | 2,757 (25%) |
| Thalassemia | 117 (1.1%) | 112 (1.0%) |
| Type 1 Diabetes Mellitus | 19 (0.2%) | 7 (<0.1%) |

* 1,529 individuals appear in both groups, as they were first recruited as unvaccinated and then, following vaccination, re-recruited as vaccinated.

** The weight measurement used was taken prior to the index pregnancy.

# Table S4 - Event counts for each outcome at each analysis period

| **Period** | **Documented Infection** | | **Symptomatic Infection** | | **Hospitalization** | | **Severe Disease** | | **Death** | |
| --- | --- | --- | --- | --- | --- | --- | --- | --- | --- | --- |
|  | **Events in Unvaccinated** | **Events in Vaccinated** | **Events in Unvaccinated** | **Events in Vaccinated** | **Events in Unvaccinated** | **Events in Vaccinated** | **Events in Unvaccinated** | **Events in Vaccinated** | **Events in Unvaccinated** | **Events in Vaccinated** |
| Days 14-20  after 1st dose | 39 | 13 | 29 | 10 | 3 | 0 | 2 | 0 | 0 | 0 |
| Days 21-27  after 1st dose | 17 | 5 | 12 | 3 | 5 | 0 | 0 | 0 | 0 | 0 |
| Days 7-56 after 2nd dose | 37 | 1 | 26 | 1 | 7 | 1 | 1 | 0 | 0 | 0 |

# Figure S1 – Population Flow Chart.

Size and percent change of study population resulting from each inclusion and exclusion criteria. The table focuses on the vaccinated population.


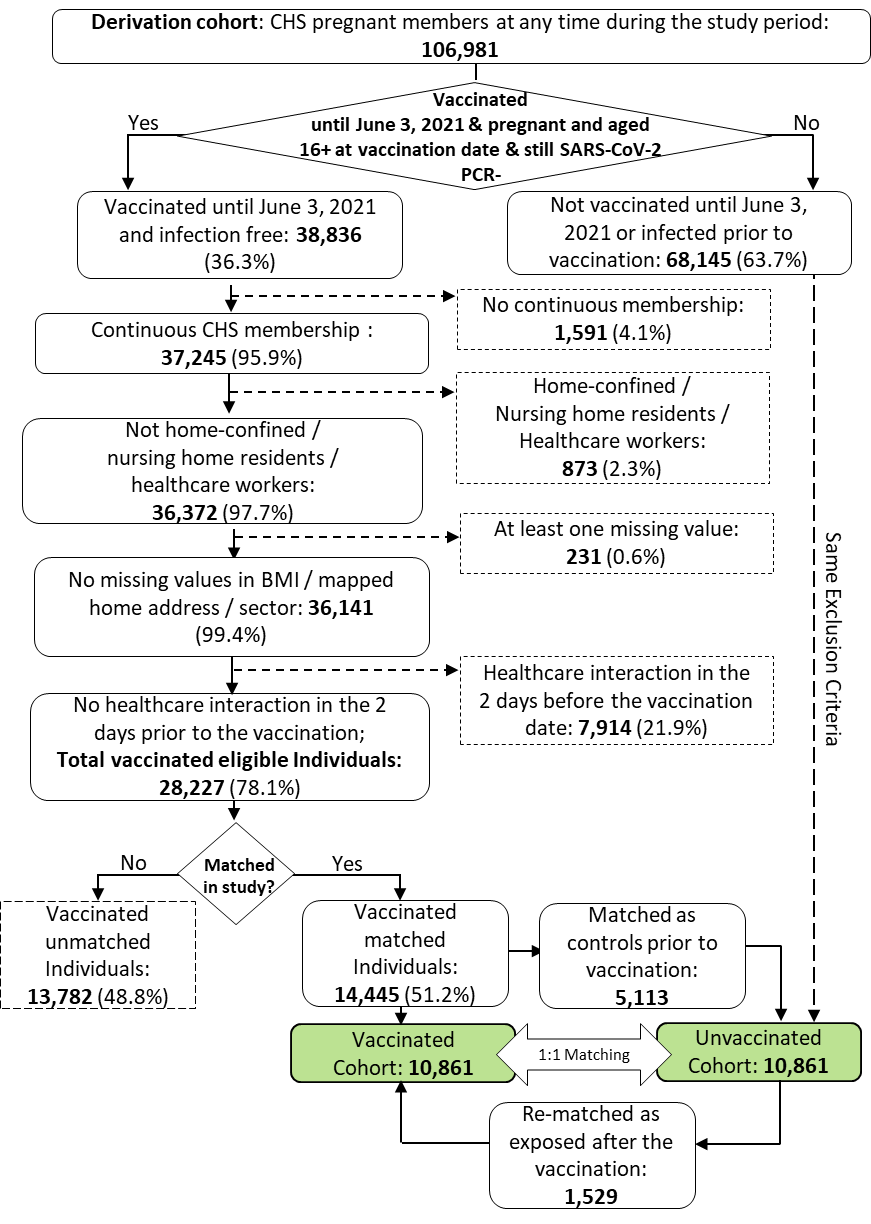

Supplement: Supplementary file 1 [file 6afdac5a6648ed2b71c6ab68.docx]
